# Supplementary material for: Enterococci, Van Gene-Carrying Enterococci, and Vancomycin Concentrations in the Influent of a Wastewater Treatment Plant in Southeast Germany
Source: MDPI journal article supplement (doi:10.3390/microorganisms12010149), 2024-01-12
Supplement: s1 [file s1]

# Supplementary Material

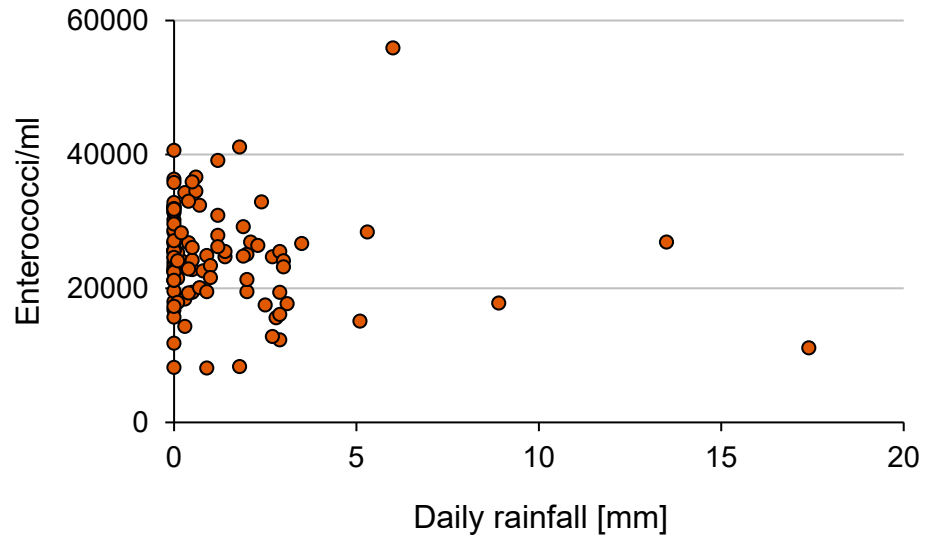

**Figure S1.** Association of measured concentration of enterococci in raw wastewater and daily rainfall.

**Table S1.** Mean physicochemical properties of raw wastewater (www.stadtentwaesserung-dresden.de).

| Parameter       | Mean concentration (mg/l) |
|-----------------|---------------------------|
| BSB-5           | 220                       |
| CSB             | 550                       |
| NH <sub>4</sub> | 45                        |
| Phosphorus      | 7.7                       |

**Table S2.** Details of duplex PCR for detection of *vanA* and *vanB* gene in enterococci strains.

| Primer          | Sequence (5'-3')                  | Reference                    |
|-----------------|-----------------------------------|------------------------------|
| vanAf           | CAT GAA TAG AAT AAA AGT TGC AAT A | Kariyama et al. [21]         |
| vanAr           | CCC CTT TAA CGC TAA TAC GAT CAA   |                              |
| vanBf           | CCA TAC TCT CCC CGG ATA G         | Farkas et al. [22], modified |
| vanBr           | GCC CTC TGC ATC CAA GCA C         |                              |
|                 |                                   |                              |
| PCR conditions: | 35 cycles at 54°C                 |                              |
